# Supplementary material
Source: PubMed Central journal article supplement (PMC5132178)

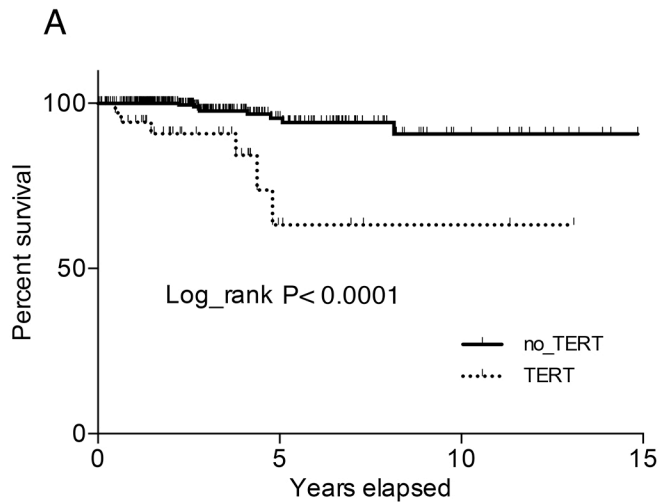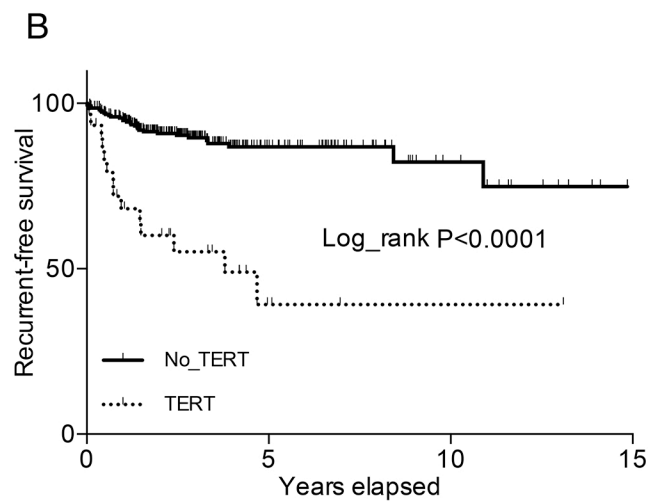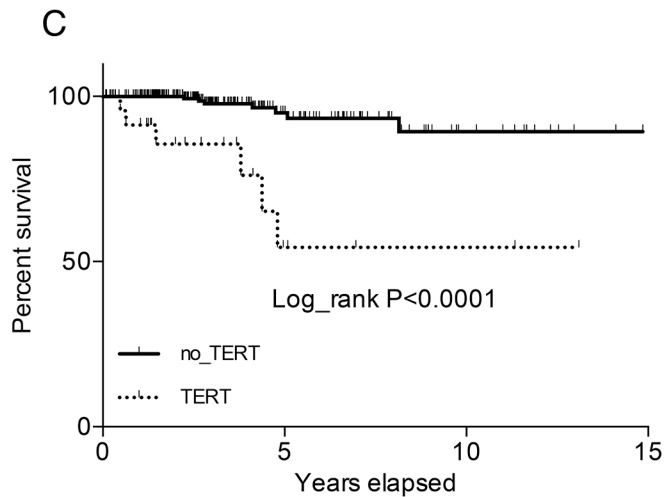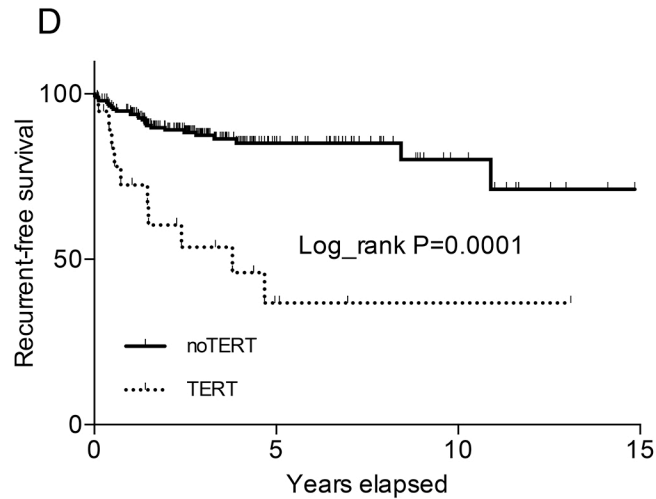

Supplement: NIHMS831653-supplement-01.pdf [file NIHMS831653-supplement-01.pdf]

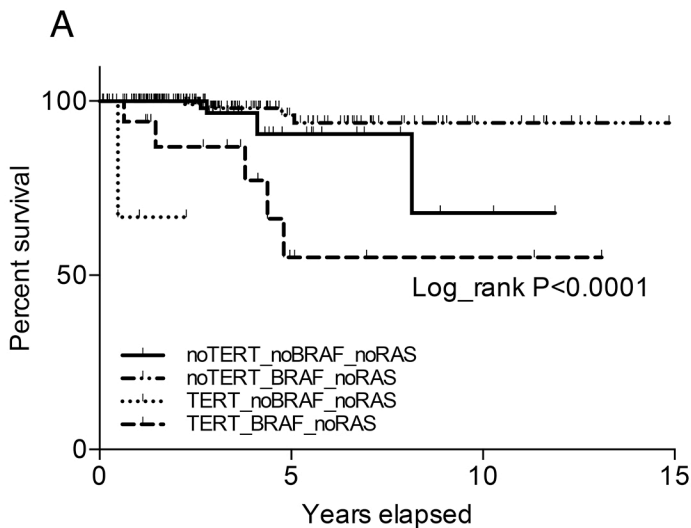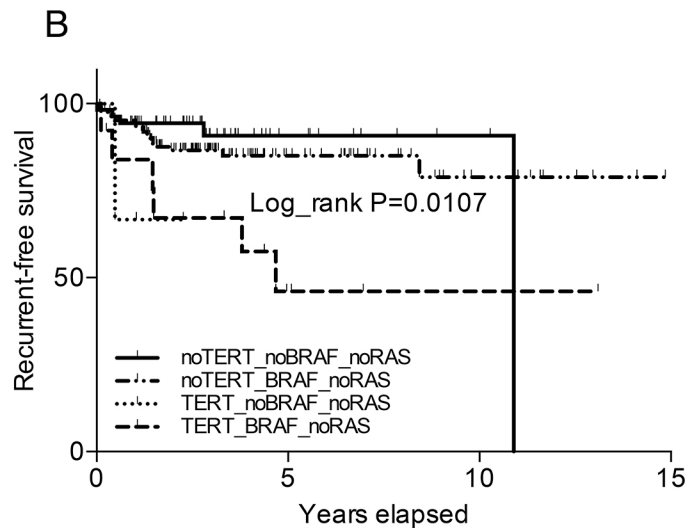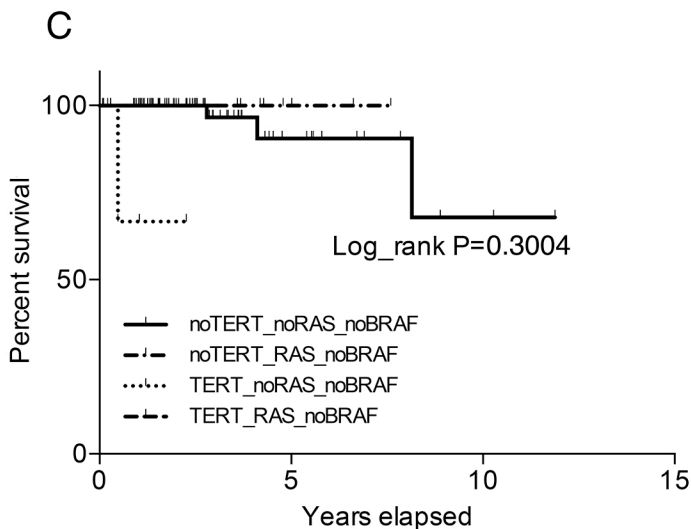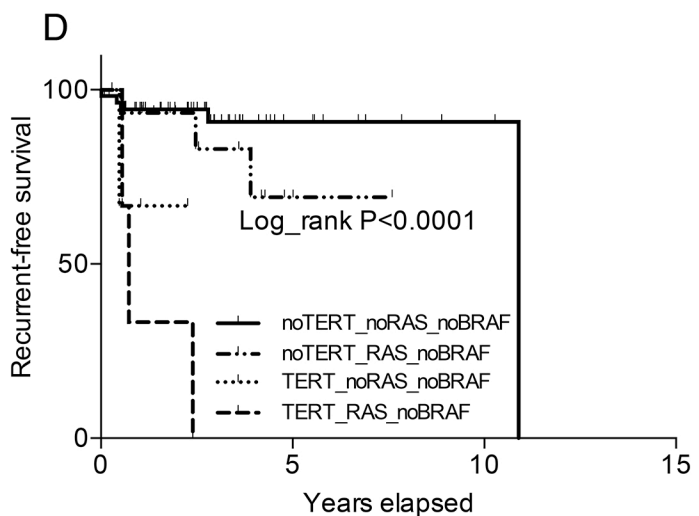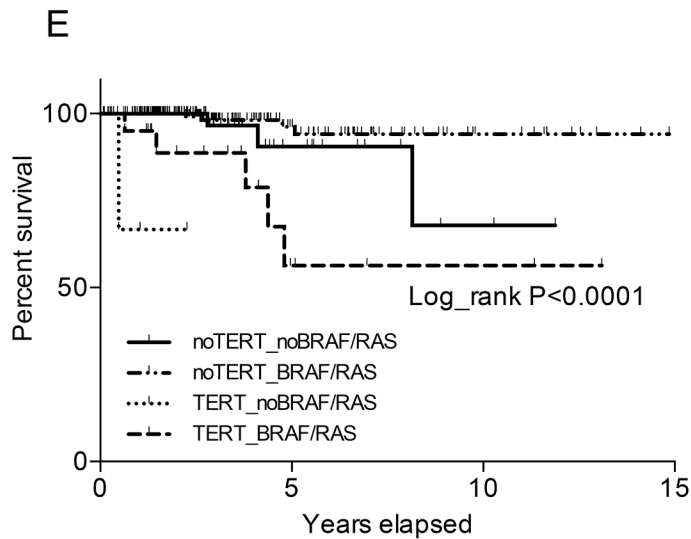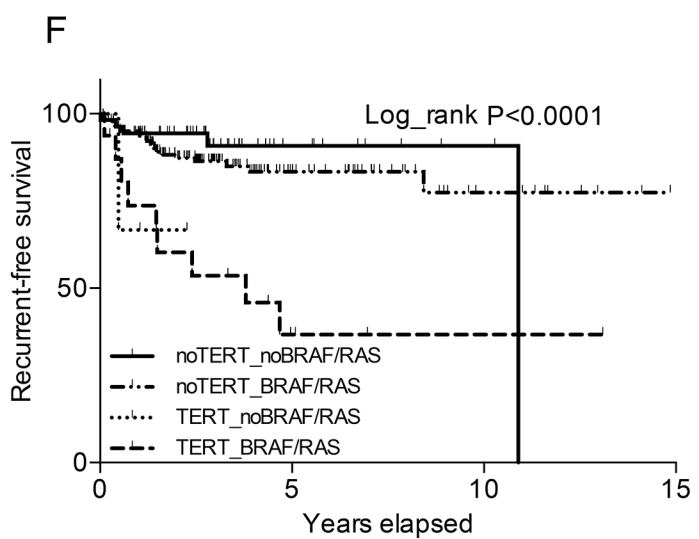

Supplement: NIHMS831653-supplement-02.pdf [file NIHMS831653-supplement-02.pdf]
